# Supplementary material for: Adaptation of the Oxygen Sensing System during Lung Development
Source: Hindawi journal article supplement (doi:10.1155/2022/9714669), 2022-01-01
Supplement: f1 [file 9714669.f1.pdf]

**Supplementary Table S1:** Primers and probes used for detection of the respective mRNA in mouse (m) or rat (r) transcripts.

|                                     | <b>Forward primer (5'→3')</b> | <b>Probe (5'→3')</b>            | <b>Reverse primer (5'→3')</b> | <b>NCBI accession no.</b> |
|-------------------------------------|-------------------------------|---------------------------------|-------------------------------|---------------------------|
| <i>mPhd1</i><br>( <i>mEgln2</i> )   | GGGGGAAAGTGGTATGGGCTG         | TGGCGAGGCCATGGTGGC<br>GTG       | CCGAGCCCATTGCCTGGATAA         | NM_001357767.1            |
| <i>mPhd2</i><br>( <i>mEgln1</i> )   | CTGACCGGCGTAACCCTCAT          | GCCAGCATAACGCCACAAGG<br>TACGCA  | TCTCGCTCGCTCATCTGCAT          | NM_053207.2               |
| <i>mPhd3</i><br><i>mEgln3</i> )     | GAGCCGGCTGGGCAAATACT          | GGAGCGGTCCAAGGCAAT<br>GGTGGCT   | TTGGGGTTGTCCACATGGCG          | NM_028133.2               |
| <i>mHif1a</i>                       | GGGGAGGACGATGAACATCAA<br>GTC  | GGAAGGTGCTTCACTGCAC<br>GGGCCA   | CCCACACTGAGGTTGGTTACTGTT      | NM_010431.2               |
| <i>mHif2a</i><br>( <i>mEpas1</i> )  | CCATGCCCTGGATTCGGAGAA         | ACTTGTGCACCAAGGGGCA<br>GGTGGT   | CGTGTTTGGCTAGCATCCGGTA        | NM_010137.3               |
| <i>mHif3a</i>                       | GGCACACAACCTAGGGGAGAA         | TCAGCGCGCACCTGGACAA<br>GGCCTC   | TTCCACTGGTTCCACTCCC           | NM_016868.3               |
| <i>mNepas</i>                       | GGCATCGAGGGCTCTGGAAC          | TCAGCGCGCACCTGGACAA<br>GGCCTC   | TCAGGTAGCAGGCGTCCAGT          | NM_001162950.1            |
| <i>mlpas</i>                        | GTACCAGCTGGCGCACTC            | TCAGCGCGCACCTGGACAA<br>GGCCTC   | GGAGGAACAGAGTCCACTGACT        | AF416641                  |
| <i>mVegfa</i>                       | TGTGCAGGCTGCTGTAACGAT         | AAGCCTGGAGTGCCTGCC<br>CACGTC    | GTGCTGGCTTTGGTGAGGTTTG        | NM_009505.4               |
| <i>mGlut1</i><br>( <i>mSlc2a1</i> ) | TGTGCTCATGACCATCGCCCT         | GGCCTTGCTGGAACGGCTG<br>CCTTGG   | AAGCCAAAGATGGCCACGATGC        | NM_011400.3               |
| <i>mTrkb</i><br>( <i>mNtrk2</i> )   | CGAGTGCTACAACCTCTGCC          | GGCTGTGAAGACGCTGAA<br>GGACGCC   | GTCTTGCGTGCATTGTGCGC          | NM_001025074.2            |
| <i>mCa9</i><br>( <i>mCar9</i> )     | GGAGGCCTGGCAGTTTTGG           | TGCCTTTCTGCAGGAGAGC<br>CCAGAAGA | GACAGCAACTGTTCTGTAAGCACT      | NM_139305.2               |
| <i>rPhd2</i><br>( <i>rEgln1</i> )   | ATGAACAAGCACGGCATCTG          |                                 | TTGGGTTATCGACGTGACGG          | XM_039098215.1            |
| <i>rPhd3</i><br>( <i>rEgln3</i> )   | ATGGTGATGGCCGCTGTATC          |                                 | GACTTCACACCACCGTCAGT          | NM_019371.2               |
| <i>rVegfa</i>                       | GTACCTCCACCATGCCAAGT          |                                 | CTGCATGGTGATGTTGCTT           | NM_001110334              |
| <i>rTrkb</i><br>( <i>rNtrk2</i> )   | GTGGAGGAAGGGAAGTCTGTG         |                                 | CAGTGGTGGTCTGAGGTTGGA         | M55293.1                  |
| <i>rCa9</i><br>( <i>rCar9</i> )     | ATCACCCAGGCTCAGAACAC          |                                 | TCGGTAGTAGCGACTGAGGT          | NM_001107956.1            |
| <i>rActin</i>                       | ATGGTGGGTATCAGAA              |                                 | GGGGTGTGACTCAA                | NM_031144                 |
