# Supplementary material for: Adaptation of the Oxygen Sensing System during Lung Development
Source: Hindawi journal article supplement (doi:10.1155/2022/9714669), 2022-01-01
Supplement: f2 [file 9714669.f2.pdf]

**Supplementary Table S2:** Point estimates and confidence intervals for longitudinal gene expression in normal lung development. Seq: Sequen, md: McDermott

| <b>Phd1</b>         |                     |                     |                      |                    |                    |                    |                     |
|---------------------|---------------------|---------------------|----------------------|--------------------|--------------------|--------------------|---------------------|
| <b>contrast.seq</b> | <b>estimate.seq</b> | <b>conf.low.seq</b> | <b>conf.high.seq</b> | <b>contrast.md</b> | <b>estimate.md</b> | <b>conf.low.md</b> | <b>conf.high.md</b> |
| 2 - 1               | 0,414271501         | -0,016855741        | 0,845398743          | C 1                | 0,414271501        | -0,004540537       | 0,833083539         |
| 3 - 2               | -0,263374316        | -1,167682609        | 0,640933977          | C 2                | -0,091951626       | -0,953164571       | 0,769261319         |
| 4 - 3               | -0,153497537        | -0,536473942        | 0,229478868          | C 3                | -0,214102018       | -0,807465507       | 0,379261471         |
| 5 - 4               | -0,201825735        | -0,550725197        | 0,147073728          | C 4                | -0,344560413       | -0,787953711       | 0,098832885         |
| 6 - 5               | -0,001787798        | -0,3640596          | 0,360484004          | C 5                | -0,263178456       | -0,647496534       | 0,121139621         |
| 7 - 6               | 0,028456238         | -0,8057958          | 0,862708276          | C 6                | -0,187548721       | -0,833327411       | 0,458229969         |
| 8 - 7               | -0,323833157        | -0,813675746        | 0,166009432          | C 7                | -0,492309127       | -1,107307205       | 0,122688951         |
| 9 - 8               | -0,193235097        | -0,660304712        | 0,273834517          | C 8                | -0,647082574       | -1,194254469       | 0,099910678         |
| 10 - 9              | 0,037305856         | -0,380227253        | 0,454838964          | C 9                | -0,541900924       | -1,048988424       | 0,034813423         |
| 11 - 10             | -0,106009442        | -0,505766959        | 0,293748075          | C 10               | -0,596464076       | -1,057485372       | -0,13544278         |
| 12 - 11             | -0,112700714        | -0,520319438        | 0,294918011          | C 11               | -0,648162782       | -1,100964013       | -0,19536155         |
| 13 - 12             | -0,053935364        | -0,444956702        | 0,337085974          | C 12               | -0,654338783       | -1,022958865       | 0,285718701         |
| <b>Phd2</b>         |                     |                     |                      |                    |                    |                    |                     |
| <b>contrast.seq</b> | <b>estimate.seq</b> | <b>conf.low.seq</b> | <b>conf.high.seq</b> | <b>contrast.md</b> | <b>estimate.md</b> | <b>conf.low.md</b> | <b>conf.high.md</b> |
| 2 - 1               | -0,007895973        | -0,273280706        | 0,257488759          | C 1                | -0,007895973       | -0,256638701       | 0,240846754         |
| 3 - 2               | -0,26352081         | -1,03191853         | 0,504876909          | C 2                | -0,26678811        | -0,979607551       | 0,446031331         |
| 4 - 3               | -0,008397143        | -0,244143857        | 0,227349571          | C 3                | -0,184234761       | -0,665137667       | 0,296668144         |
| 5 - 4               | 0,12600959          | -0,088759962        | 0,340779143          | C 4                | 0,003186416        | -0,33877484        | 0,345147672         |
| 6 - 5               | 0,193976461         | -0,029027712        | 0,416980633          | C 5                | 0,196393742        | -0,085542836       | 0,47833032          |
| 7 - 6               | -0,373946509        | -1,110526311        | 0,362633294          | C 6                | -0,212755419       | -0,738965211       | 0,313454374         |
| 8 - 7               | 0,132134673         | -0,169397022        | 0,433666369          | C 7                | -0,058984601       | -0,547008583       | 0,429039381         |
| 9 - 8               | -0,038102629        | -0,325616391        | 0,249411134          | C 8                | -0,092479058       | -0,53363628        | 0,348678165         |
| 10 - 9              | 0,194700624         | -0,062316102        | 0,45171735           | C 9                | 0,111922167        | -0,290593816       | 0,514438149         |
| 11 - 10             | 0,245032383         | -0,001042398        | 0,491107164          | C 10               | 0,346329027        | -0,018896439       | 0,711554494         |
| 12 - 11             | 0,310983028         | 0,060066665         | 0,561899392          | C 11               | 0,621892042        | 0,276353498        | 0,967430585         |
| 13 - 12             | 0,060857928         | -0,178750969        | 0,300466826          | C 12               | 0,636926346        | 0,342877828        | 0,930974863         |
| <b>Phd3</b>         |                     |                     |                      |                    |                    |                    |                     |
| <b>contrast.seq</b> | <b>estimate.seq</b> | <b>conf.low.seq</b> | <b>conf.high.seq</b> | <b>contrast.md</b> | <b>estimate.md</b> | <b>conf.low.md</b> | <b>conf.high.md</b> |
| 2 - 1               | -0,181568371        | -0,687994329        | 0,324857586          | C 1                | -0,181568371       | -0,657179007       | 0,294042264         |
| 3 - 2               | 1,086209699         | -0,33225838         | 2,504677779          | C 2                | 1,008394683        | -0,308074964       | 2,32486433          |
| 4 - 3               | 0,312183068         | -0,13197858         | 0,756344716          | C 3                | 0,968812164        | 0,088999825        | 1,848624502         |
| 5 - 4               | 0,596689336         | 0,192049934         | 1,001328737          | C 4                | 1,237595844        | 0,613162822        | 1,862028866         |
| 6 - 5               | 0,238116771         | -0,182036935        | 0,658270477          | C 5                | 1,173508979        | 0,657176413        | 1,689841544         |
| 7 - 6               | -2,317388775        | -3,67164394         | -0,963133611         | C 6                | -1,35622904        | -2,334541005       | 0,377917075         |
| 8 - 7               | 0,078786549         | -0,489320648        | 0,646893746          | C 7                | -1,138342077       | -2,045778959       | 0,230905195         |
| 9 - 8               | 0,389707882         | -0,151988753        | 0,931404517          | C 8                | -0,65900096        | -1,478388888       | 0,160386968         |
| 10 - 9              | 0,120057773         | -0,364178062        | 0,604293608          | C 9                | -0,469330409       | -1,216920414       | 0,278259595         |
| 11 - 10             | -0,998033935        | -1,461654449        | -0,53441342          | C 10               | -1,422523859       | -2,10055252        | 0,744495198         |

|                     |                     |                     |                      |                    |                    |                    |                     |   |
|---------------------|---------------------|---------------------|----------------------|--------------------|--------------------|--------------------|---------------------|---|
| 12 - 11             | -0,625473516        | -1,098217311        | -0,152729722         | C 11               | -1,901680636       | -2,543988873       | 1,259372398         | - |
| 13 - 12             | 0,477313092         | 0,017400054         | 0,93722613           | C 12               | -1,283502312       | -1,832258242       | 0,734746382         | - |
| <b>Hif1a</b>        |                     |                     |                      |                    |                    |                    |                     |   |
| <b>contrast.seq</b> | <b>estimate.seq</b> | <b>conf.low.seq</b> | <b>conf.high.seq</b> | <b>contrast.md</b> | <b>estimate.md</b> | <b>conf.low.md</b> | <b>conf.high.md</b> |   |
| 2 - 1               | 0,052010952         | -0,225687812        | 0,329709717          | C 1                | 0,052010952        | -0,214151134       | 0,318173038         | - |
| 3 - 2               | -0,997761459        | -1,622382235        | -0,373140683         | C 2                | -0,973756404       | -1,559689036       | 0,387823772         | - |
| 4 - 3               | 0,144136419         | -0,092288897        | 0,380561735          | C 3                | -0,473367642       | -0,861535929       | 0,085199355         | - |
| 5 - 4               | -0,124413711        | -0,339801781        | 0,090974359          | C 4                | -0,432478367       | -0,714187207       | 0,150769526         | - |
| 6 - 5               | -0,320686163        | -0,544331027        | -0,097041299         | C 5                | -0,645044938       | -0,885536338       | 0,404553538         | - |
| 7 - 6               | 0,67711792          | 0,089918541         | 1,264317299          | C 6                | 0,151061854        | -0,288601624       | 0,590725333         | - |
| 8 - 7               | -0,205601684        | -0,508936242        | 0,097732874          | C 7                | -0,070302806       | -0,488969721       | 0,348364108         | - |
| 9 - 8               | -0,056878898        | -0,345219626        | 0,231461829          | C 8                | -0,12155748        | -0,496198107       | 0,253083147         | - |
| 10 - 9              | 0,059578311         | -0,198179173        | 0,317335794          | C 9                | -0,048955154       | -0,393091624       | 0,295181316         | - |
| 11 - 10             | 0,024979329         | -0,221804672        | 0,271763331          | C 10               | -0,019238229       | -0,331387964       | 0,292911506         | - |
| 12 - 11             | -0,338831603        | -0,590470155        | -0,087193052         | C 11               | -0,356068167       | -0,657440124       | -0,05469621         | - |
| 13 - 12             | -0,219179303        | -0,457777596        | 0,019418991          | C 12               | -0,54858996        | -0,798563294       | 0,298616625         | - |
| <b>Hif2a</b>        |                     |                     |                      |                    |                    |                    |                     |   |
| <b>contrast.seq</b> | <b>estimate.seq</b> | <b>conf.low.seq</b> | <b>conf.high.seq</b> | <b>contrast.md</b> | <b>estimate.md</b> | <b>conf.low.md</b> | <b>conf.high.md</b> |   |
| 2 - 1               | -0,277584384        | -0,756509039        | 0,201340272          | C 1                | -0,277584384       | -0,757225219       | 0,202056451         | - |
| 3 - 2               | 1,138846331         | 0,514663188         | 1,763029474          | C 2                | 1,023983828        | 0,431211083        | 1,616756572         | - |
| 4 - 3               | 0,787682571         | 0,362265753         | 1,213099389          | C 3                | 1,462581003        | 1,024576095        | 1,90058591          | - |
| 5 - 4               | 0,836385058         | 0,448814933         | 1,223955183          | C 4                | 1,81143906         | 1,440130807        | 2,182747312         | - |
| 6 - 5               | 0,478892819         | 0,076502051         | 0,881283587          | C 5                | 1,853087968        | 1,50000479         | 2,206171145         | - |
| 7 - 6               | 2,496001607         | 1,912833986         | 3,079169227          | C 6                | 4,016932297        | 3,529908282        | 4,503956312         | - |
| 8 - 7               | -0,297379183        | -0,841476124        | 0,246717759          | C 7                | 3,311051525        | 2,815013164        | 3,807089886         | - |
| 9 - 8               | -0,12200876         | -0,64080541         | 0,39678789           | C 8                | 2,930366865        | 2,50581997         | 3,354913759         | - |
| 10 - 9              | 0,124742525         | -0,339080868        | 0,588565918          | C 9                | 2,74772825         | 2,339017481        | 3,156439019         | - |
| 11 - 10             | 0,797333017         | 0,353255927         | 1,241410107          | C 10               | 3,284200991        | 2,910922967        | 3,657479014         | - |
| 12 - 11             | 0,608847404         | 0,156069817         | 1,06162499           | C 11               | 3,557164202        | 3,161559358        | 3,952769046         | - |
| 13 - 12             | -0,275611011        | -0,699465145        | 0,148243123          | C 12               | 3,019446356        | 2,723431381        | 3,31546133          | - |
| <b>Hif3a</b>        |                     |                     |                      |                    |                    |                    |                     |   |
| <b>contrast.seq</b> | <b>estimate.seq</b> | <b>conf.low.seq</b> | <b>conf.high.seq</b> | <b>contrast.md</b> | <b>estimate.md</b> | <b>conf.low.md</b> | <b>conf.high.md</b> |   |
| 2 - 1               | -0,092844141        | -1,178417759        | 0,992729477          | C 1                | -0,092844141       | -1,176669053       | 0,990980771         | - |
| 3 - 2               | 0,485152923         | -1,041463293        | 2,011769139          | C 2                | 0,446734657        | -1,009946867       | 1,903416181         | - |
| 4 - 3               | 0,384374625         | -0,579926535        | 1,348675786          | C 3                | 0,678813377        | -0,380411998       | 1,738038752         | - |
| 5 - 4               | 0,304223548         | -0,574285088        | 1,182732183          | C 4                | 0,756765799        | -0,11917262        | 1,632704217         | - |
| 6 - 5               | -0,339368849        | -1,251495467        | 0,572757768          | C 5                | 0,234729343        | -0,585631132       | 1,055089817         | - |
| 7 - 6               | 0,221095263         | -1,191118764        | 1,63330929           | C 6                | 0,413750478        | -0,756482796       | 1,583983752         | - |
| 8 - 7               | -2,836004881        | -4,06933975         | -1,602670012         | C 7                | -2,464330723       | -3,640868895       | -1,28779255         | - |
| 9 - 8               | -1,517055074        | -2,693043782        | -0,341066366         | C 8                | -3,788859959       | -4,803204497       | 2,774515421         | - |
| 10 - 9              | -1,187655835        | -2,238999575        | -0,136312094         | C 9                | -4,579082931       | -5,548584605       | 3,609581257         | - |

|                     |                     |                     |                      |                    |                    |                    |                     |   |
|---------------------|---------------------|---------------------|----------------------|--------------------|--------------------|--------------------|---------------------|---|
| 11 - 10             | 2,185218279         | 1,178633282         | 3,191803276          | C 10               | -1,959141589       | -2,843856747       | 1,074426432         | - |
| 12 - 11             | -0,377494611        | -1,403822943        | 0,648833722          | C 11               | -2,136269446       | -3,061788236       | 1,210750657         | - |
| 13 - 12             | -2,058741123        | -3,022419136        | -1,09506311          | C 12               | -4,037601241       | -4,735428953       | -3,33977353         | - |
| <b>Nepas</b>        |                     |                     |                      |                    |                    |                    |                     |   |
| <b>contrast.seq</b> | <b>estimate.seq</b> | <b>conf.low.seq</b> | <b>conf.high.seq</b> | <b>contrast.md</b> | <b>estimate.md</b> | <b>conf.low.md</b> | <b>conf.high.md</b> |   |
| 2 - 1               | 0,023202904         | -0,894579611        | 0,940985419          | C 1                | 0,023202904        | -0,881637298       | 0,928043106         | - |
| 3 - 2               | 0,532384962         | -1,058635319        | 2,123405242          | C 2                | 0,541986163        | -0,981256574       | 2,065228901         | - |
| 4 - 3               | 0,967908246         | 0,15263687          | 1,783179622          | C 3                | 1,325126399        | 0,253935016        | 2,396317782         | - |
| 5 - 4               | 0,766258169         | 0,02352628          | 1,508990058          | C 4                | 1,649675768        | 0,814675439        | 2,484676097         | - |
| 6 - 5               | 0,132490205         | -0,638694469        | 0,903674879          | C 5                | 1,383968374        | 0,633928257        | 2,134008491         | - |
| 7 - 6               | -0,809531151        | -2,260596432        | 0,641534131          | C 6                | 0,326367421        | -0,842439797       | 1,495174639         | - |
| 8 - 7               | -2,515531667        | -3,558283326        | -1,472780008         | C 7                | -2,222354154       | -3,361251618       | 1,083456689         | - |
| 9 - 8               | -0,963381847        | -1,957653292        | 0,030889598          | C 8                | -3,012114582       | -4,011820994       | 2,012408171         | - |
| 10 - 9              | -1,223507408        | -2,112350768        | -0,334664047         | C 9                | -3,919665915       | -4,85843809        | -2,98089374         | - |
| 11 - 10             | 0,617895627         | -0,233107101        | 1,468898355          | C 10               | -2,929650106       | -3,784525863       | 2,074774349         | - |
| 12 - 11             | -0,344916125        | -1,212639099        | 0,52280685           | C 11               | -2,974942925       | -3,838874439       | -2,11101141         | - |
| 13 - 12             | -2,27226578         | -3,093615819        | -1,450915741         | C 12               | -5,028002384       | -5,705656499       | 4,350348269         | - |
| <b>lpas</b>         |                     |                     |                      |                    |                    |                    |                     |   |
| <b>contrast.seq</b> | <b>estimate.seq</b> | <b>conf.low.seq</b> | <b>conf.high.seq</b> | <b>contrast.md</b> | <b>estimate.md</b> | <b>conf.low.md</b> | <b>conf.high.md</b> |   |
| 2 - 1               | 2,259439807         | 0,852166519         | 3,666713094          | C 1                | 2,259439807        | 0,842892922        | 3,675986691         | - |
| 3 - 2               | 0,196194694         | -1,128223898        | 1,520613287          | C 2                | 1,16452604         | -0,022368507       | 2,351420587         | - |
| 4 - 3               | 0,968842947         | -0,265096746        | 2,202782641          | C 3                | 1,727138973        | 0,754809026        | 2,699468921         | - |
| 5 - 4               | 0,379829734         | -0,744421266        | 1,504080735          | C 4                | 1,522398594        | 0,591321908        | 2,453475279         | - |
| 6 - 5               | -0,095078208        | -1,261870605        | 1,07171419           | C 5                | 1,055571892        | 0,115261631        | 1,995882153         | - |
| 7 - 6               | 5,104896655         | 3,74607185          | 6,46372146           | C 6                | 5,9694603          | 4,839117401        | 7,099803198         | - |
| 8 - 7               | -4,164782729        | -5,742651062        | -2,586914396         | C 7                | 1,192425232        | -0,029688099       | 2,414538563         | - |
| 9 - 8               | -1,613036898        | -3,117475324        | -0,108598472         | C 8                | -0,514503417       | -1,527246379       | 0,498239546         | - |
| 10 - 9              | -2,326538509        | -3,672149144        | -0,980927873         | C 9                | -2,786692973       | -3,793769739       | 1,779616207         | - |
| 11 - 10             | 1,526339348         | 0,220905282         | 2,831773414          | C 10               | -0,994109073       | -1,941224453       | 0,046993693         | - |
| 12 - 11             | -1,154006026        | -2,48397776         | 0,175965709          | C 11               | -2,0509895         | -3,081477253       | 1,020501747         | - |
| 13 - 12             | -0,652027507        | -1,873628414        | 0,5695734            | C 12               | -2,550283746       | -3,32643049        | 1,774137002         | - |
| <b>Glut1</b>        |                     |                     |                      |                    |                    |                    |                     |   |
| <b>contrast.seq</b> | <b>estimate.seq</b> | <b>conf.low.seq</b> | <b>conf.high.seq</b> | <b>contrast.md</b> | <b>estimate.md</b> | <b>conf.low.md</b> | <b>conf.high.md</b> |   |
| 2 - 1               | -0,325840708        | -0,713313663        | 0,061632247          | C 1                | -0,325840708       | -0,71506287        | 0,063381455         | - |
| 3 - 2               | -0,398218112        | -0,837991585        | 0,04155536           | C 2                | -0,53304875        | -0,94440179        | 0,121695711         | - |
| 4 - 3               | -0,185054676        | -0,529222884        | 0,159113532          | C 3                | -0,536382261       | -0,851545845       | 0,221218677         | - |
| 5 - 4               | -0,025023478        | -0,338578213        | 0,288531257          | C 4                | -0,382611652       | -0,663285361       | 0,101937944         | - |
| 6 - 5               | 0,073763036         | -0,251756042        | 0,399282114          | C 5                | -0,21649408        | -0,490686531       | 0,057698372         | - |
| 7 - 6               | -0,100380915        | -0,524884066        | 0,324122237          | C 6                | -0,278069452       | -0,634250274       | 0,07811137          | - |

|                     |                     |                     |                      |                    |                    |                    |                     |   |
|---------------------|---------------------|---------------------|----------------------|--------------------|--------------------|--------------------|---------------------|---|
| 8 - 7               | -0,883947652        | -1,324109893        | -0,44378541          | C 7                | -1,133738854       | -1,505656644       | 0,761821064         | - |
| 9 - 8               | -0,212898154        | -0,632589386        | 0,206793077          | C 8                | -1,258063661       | -1,572032866       | 0,944094455         | - |
| 10 - 9              | -0,278317614        | -0,653572925        | 0,096937698          | C 9                | -1,404416555       | -1,710823984       | 1,098009126         | - |
| 11 - 10             | 0,311156058         | -0,048123549        | 0,670435666          | C 10               | -0,959929811       | -1,240204802       | -0,67965482         | - |
| 12 - 11             | 0,600578493         | 0,234283194         | 0,966873792          | C 11               | -0,261176678       | -0,565155404       | 0,042802048         | - |
| 13 - 12             | 0,643428676         | 0,302456213         | 0,98440114           | C 12               | 0,401496595        | 0,175916088        | 0,627077103         | - |
| <b>Ca9</b>          |                     |                     |                      |                    |                    |                    |                     |   |
| <b>contrast.seq</b> | <b>estimate.seq</b> | <b>conf.low.seq</b> | <b>conf.high.seq</b> | <b>contrast.md</b> | <b>estimate.md</b> | <b>conf.low.md</b> | <b>conf.high.md</b> |   |
| 2 - 1               | 0,156902932         | -0,421868042        | 0,735673906          | C 1                | 0,156902932        | -0,425107987       | 0,73891385          |   |
| 3 - 2               | -0,140515189        | -0,790652017        | 0,50962164           | C 2                | -0,075589838       | -0,683391875       | 0,5322122           |   |
| 4 - 3               | 0,179883396         | -0,334200677        | 0,693967468          | C 3                | 0,130062821        | -0,337074367       | 0,597200008         |   |
| 5 - 4               | -0,301158488        | -0,769516024        | 0,167199049          | C 4                | -0,21444994        | -0,632085582       | 0,203185701         |   |
| 6 - 5               | -0,166212873        | -0,652437403        | 0,320011657          | C 5                | -0,328899035       | -0,737690761       | 0,079892692         |   |
| 7 - 6               | 0,082069928         | -0,547517106        | 0,711656962          | C 6                | -0,187875506       | -0,716578249       | 0,340827237         |   |
| 8 - 7               | -0,071607688        | -0,72907496         | 0,585859584          | C 7                | -0,24037721        | -0,793492865       | 0,312738445         |   |
| 9 - 8               | 0,037967637         | -0,588921655        | 0,66485693           | C 8                | -0,183630103       | -0,650080399       | 0,282820193         |   |
| 10 - 9              | 0,076839548         | -0,48368185         | 0,637360945          | C 9                | -0,087528657       | -0,543216019       | 0,368158706         |   |
| 11 - 10             | 0,336742281         | -0,1999161          | 0,873400661          | C 10               | 0,257523307        | -0,159347962       | 0,674394575         |   |
| 12 - 11             | -0,234627543        | -0,781761602        | 0,312506517          | C 11               | -0,003441847       | -0,456326996       | 0,449443302         |   |
| 13 - 12             | 0,77720624          | 0,268108344         | 1,286304137          | C 12               | 0,774018003        | 0,438053717        | 1,10998229          |   |
| <b>Trkb</b>         |                     |                     |                      |                    |                    |                    |                     |   |
| <b>contrast.seq</b> | <b>estimate.seq</b> | <b>conf.low.seq</b> | <b>conf.high.seq</b> | <b>contrast.md</b> | <b>estimate.md</b> | <b>conf.low.md</b> | <b>conf.high.md</b> |   |
| 2 - 1               | 0,788005777         | -0,392502484        | 1,968514039          | C 1                | 0,788005777        | -0,387692931       | 1,963704485         |   |
| 3 - 2               | -0,866510327        | -2,621993506        | 0,888972853          | C 2                | -0,528793565       | -2,202942834       | 1,145355704         |   |
| 4 - 3               | -0,550620549        | -1,585957257        | 0,484716159          | C 3                | -0,894951242       | -2,089969485       | 0,300067001         |   |
| 5 - 4               | -0,021835142        | -0,965056331        | 0,921386046          | C 4                | -0,61387981        | -1,582140407       | 0,354380786         |   |
| 6 - 5               | 0,925936816         | -0,053394497        | 1,905268129          | C 5                | 0,46195789         | -0,434457311       | 1,358373091         |   |
| 7 - 6               | 0,983203269         | -0,624388002        | 2,590794541          | C 6                | 1,361568779        | 0,03726465         | 2,685872908         |   |
| 8 - 7               | -0,057743351        | -1,381944961        | 1,26645826           | C 7                | 1,164177349        | -0,152695857       | 2,481050554         |   |
| 9 - 8               | 0,373501555         | -0,889131155        | 1,636134266          | C 8                | 1,446011396        | 0,304211483        | 2,587811309         |   |
| 10 - 9              | 0,712418133         | -0,416363665        | 1,841199931          | C 9                | 2,005681846        | 0,921098028        | 3,090265665         |   |
| 11 - 10             | 1,131274388         | 0,050548096         | 2,212000681          | C 10               | 2,945330581        | 1,95653677         | 3,934124392         |   |
| 12 - 11             | -0,793886402        | -1,895824901        | 0,308052098          | C 11               | 1,848495891        | 0,825484541        | 2,87150724          |   |
| 13 - 12             | -0,227651368        | -1,264794202        | 0,809491466          | C 12               | 1,483918901        | 0,705442769        | 2,262395033         |   |
| <b>Vegfa</b>        |                     |                     |                      |                    |                    |                    |                     |   |
| <b>contrast.seq</b> | <b>estimate.seq</b> | <b>conf.low.seq</b> | <b>conf.high.seq</b> | <b>contrast.md</b> | <b>estimate.md</b> | <b>conf.low.md</b> | <b>conf.high.md</b> |   |
| 2 - 1               | -0,165925237        | -0,553402151        | 0,221551677          | C 1                | -0,165925237       | -0,539463461       | 0,207612986         |   |
| 3 - 2               | 0,285939845         | -0,575109408        | 1,146989097          | C 2                | 0,217281126        | -0,598275733       | 1,032837985         |   |
| 4 - 3               | 0,202672595         | -0,141529377        | 0,546874566          | C 3                | 0,345880609        | -0,213325586       | 0,905086805         |   |
| 5 - 4               | 0,883850644         | 0,570275766         | 1,197425522          | C 4                | 1,114437717        | 0,701041786        | 1,527833647         |   |
| 6 - 5               | 0,921155891         | 0,595561176         | 1,246750606          | C 5                | 1,7665914          | 1,411849785        | 2,121333016         |   |
| 7 - 6               | 0,800721949         | -0,00760084         | 1,609044737          | C 6                | 2,250660173        | 1,63983085         | 2,861489496         |   |
| 8 - 7               | 0,315636286         | -0,124605026        | 0,755877599          | C 7                | 2,337415764        | 1,759330582        | 2,915500946         |   |
| 9 - 8               | -0,221345689        | -0,64111942         | 0,198428041          | C 8                | 1,933459468        | 1,417181683        | 2,449737253         |   |

|         |              |              |             |      |             |             |             |
|---------|--------------|--------------|-------------|------|-------------|-------------|-------------|
| 10 - 9  | -0,020521233 | -0,395780378 | 0,354737912 | C 9  | 1,710127801 | 1,233383522 | 2,186872081 |
| 11 - 10 | 0,40331341   | 0,044030132  | 0,762596688 | C 10 | 1,951087306 | 1,517847464 | 2,384327148 |
| 12 - 11 | 0,396670706  | 0,030325944  | 0,763015469 | C 11 | 2,148214992 | 1,726153371 | 2,570276613 |
| 13 - 12 | -0,129778228 | -0,473421991 | 0,213865535 | C 12 | 1,860147238 | 1,519259632 | 2,201034845 |
