# Supplementary material for: Adaptation of the Oxygen Sensing System during Lung Development
Source: Hindawi journal article supplement (doi:10.1155/2022/9714669), 2022-01-01
Supplement: f3 [file 9714669.f3.pdf]

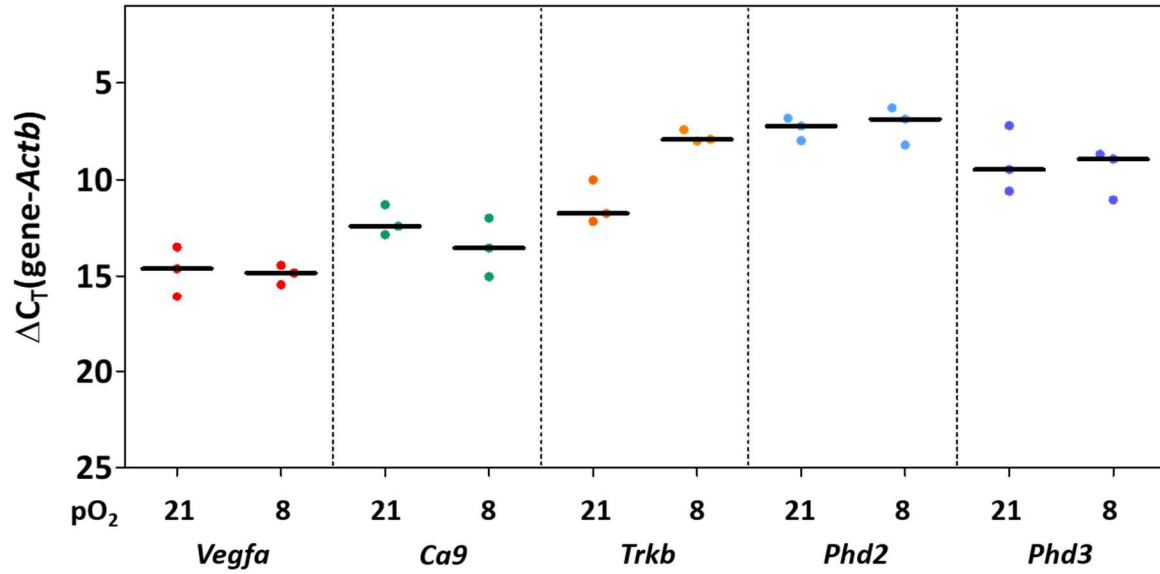

**Supplementary Figure S1: Effects of systemic hypoxia on HRG expression in rats.** Relative expression quantification of *bona fide* HRGs in adult rats exposed to 21% vs. 8%  $O_2$  for 6 h, n=3 per condition. Statistical significance (Mann-Whitney-U test) in comparison to the respective controls is indicated by \*p<0.05, \*\*p<0.01, \*\*\*p<0.001. The black bar represents the median.
